# Supplementary material for: Identification of microRNAs involved in pathways which characterize the expression subtypes of NSCLC
Source: PubMed Central journal article supplement (PMC6887593; doi:10.1002/1878-0261.12571), 2019-09-22

## Adenocarcinomas

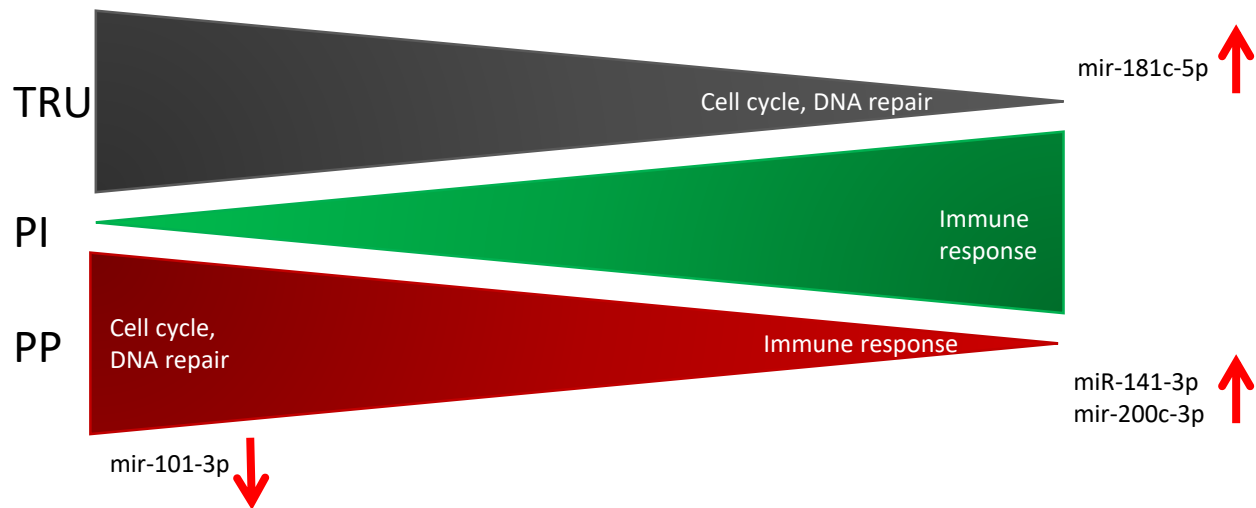

## Squamous Cell Carcinomas

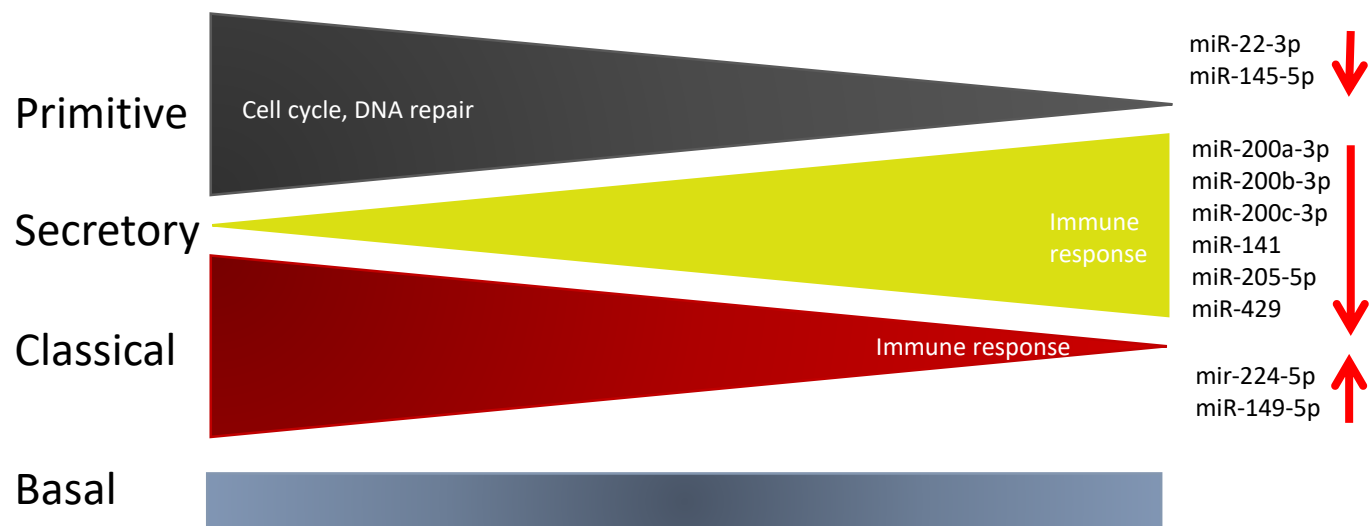

Supplement: MOL2-13-2604-s007.pdf [file MOL2-13-2604-s007.pdf]
